# Supplementary material for: A dual-mode green emissive fluorescent probe for real-time detection of doxycycline in milk using a smartphone sensing platform
Source: Royal Society of Chemistry journal article supplement (doi:10.1039/d3ay01850d), 2023-01-01
Supplement: d3ay01850d1.pdf [file d3ay01850d1.pdf]

## Supporting Information

### **A dual-mode green emissive fluorescent probes for real-time detection of doxycycline in milk by smartphone sensing platform**

Ruiqing Sun<sup>a</sup>, Ping Liu<sup>a</sup>, Yingjia Dong<sup>a</sup>, Qingli Yang<sup>\*, a</sup>, Yongchao Ma<sup>\*, b</sup>

<sup>a</sup> College of Food Science and Engineering, Qingdao Agricultural University, Qingdao, 266109, People's Republic of China

<sup>b</sup> College of Chemistry and Pharmaceutical Sciences, Qingdao Agricultural University, Qingdao, 266109, People's Republic of China

**\*Corresponding author:**

E-mail address: rice407@163.com (Q. Yang); yongchaoma@126.com (Y. Ma)

**Calculation of limit of detection (LOD):** The LOD was estimated based on the following equation:

$$\text{LOD} = 3S_B/K \quad \text{Eq. (A)}$$

where K is the slop of the calibration curve between the  $F_0/F$  and DOX concentration, and  $S_B$  represents the standard deviation of a blank which is  $F_0/F$  in absent of DOX ( $n = 3$ ).

**The quenching efficiencies from IFE:** The IFE was corrected according to following equation:

$$\text{CF} = \frac{F_{\text{cor}}}{F_{\text{obsd}}} = \frac{2.3dA_{\text{ex}}}{1 - 10^{-dA_{\text{ex}}}} 10^{gA_{\text{em}}} \frac{2.3sA_{\text{em}}}{1 - 10^{-sA_{\text{em}}}} \quad \text{Eq. (B)}$$

where  $F_{\text{obsd}}$  and  $F_{\text{cor}}$  represent the observed FL intensity of NCNSs at 475 nm and the corrected FL intensity by removing IFE from  $F_{\text{obsd}}$  and CF is the corrected factor.  $A_{\text{ex}}$  and  $A_{\text{em}}$  are the absorbance at an excitation wavelength of 360 nm and emission wavelength of 475 nm, respectively.  $d$  represents the cuvette width (1.0 cm);  $g$  is the distance from the edge of the excitation beam to the edge of the cuvette (0.4 cm); and the thickness of excitation beam ( $s$ ) is 0.1 cm. CF is the corrected factor and CF cannot exceed 3 to make sure that the correction is convincing. The relevant parameters and results are listed in Table S2.

The observed and corrected quenching efficiencies ( $E_{\text{obsd}}$  and  $E_{\text{cor}}$ ) were evaluated by following formula:

$$E = (1 - F/F_0) \times 100\% \quad \text{Eq. (C)}$$

where  $F_0$  and  $F$  are the FL intensities of NCNSs in the absence and presence of DOX, respectively.  $E_{\text{obsd}}$  and  $E_{\text{cor}}$  represents the observed quenching efficiency and the corrected quenching efficiency, respectively.

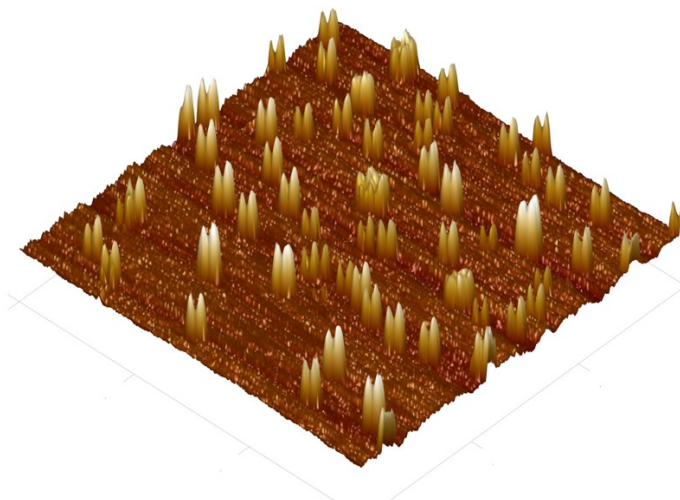

**Fig. S1.** 3D AFM images of NCNSs.

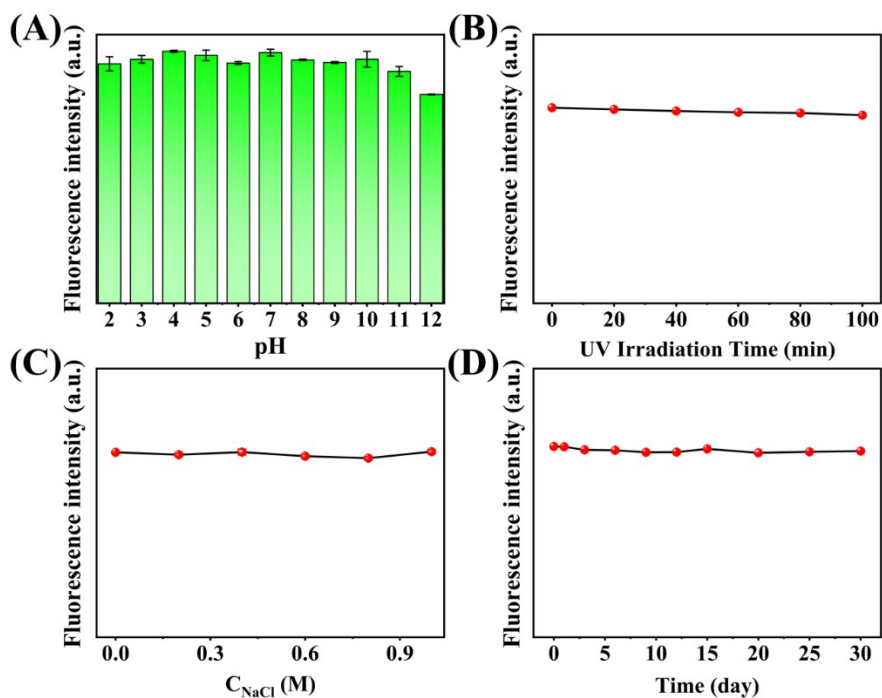

**Fig. S2.** Fluorescence stability of NCNSs at different (A) solution pH; (B) UV irradiation time; (C) concentration of NaCl and (D) storage time stress.

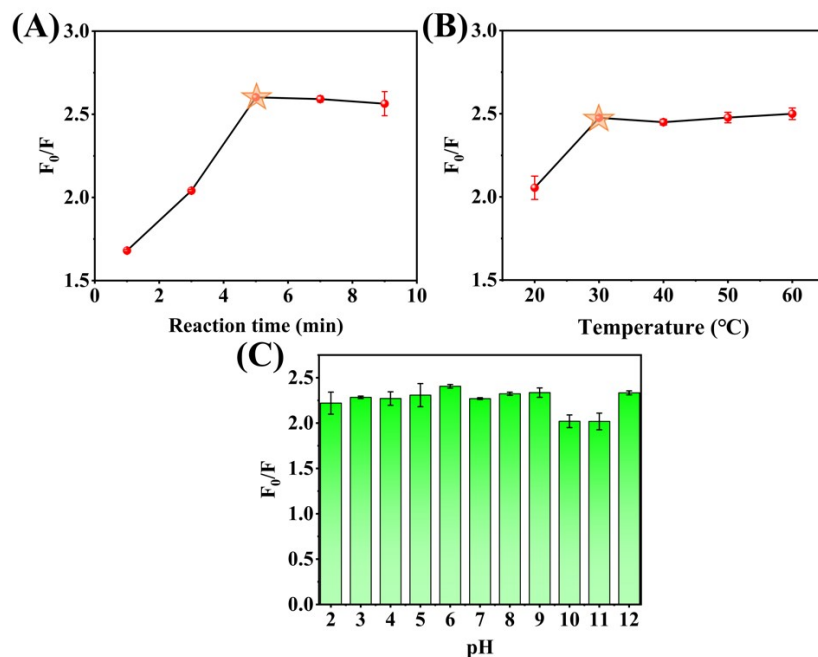

**Fig. S3.** The effect of (A) reaction time; (B) temperature and (C) solution pH on the  $F_0/F$  in the presence of DOX.

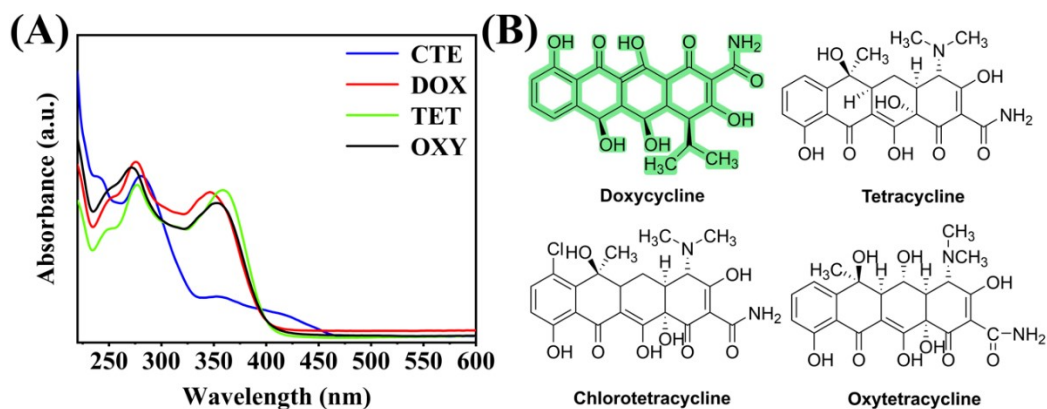

**Fig. S4.** (A) UV-vis absorption spectra and (B) the corresponding chemical structures as indicated.

**Table S1.** Comparison of the reported fluorescence probes with NCNSs for DOX detection.

| Materials used                                           | Method applied  | Linear range ( $\mu\text{mol L}^{-1}$ ) | LOD ( $\mu\text{mol L}^{-1}$ ) | Reference |
|----------------------------------------------------------|-----------------|-----------------------------------------|--------------------------------|-----------|
| $\text{W}_x\text{O}_y$ QDs                               | Fluorescence    | 0-50                                    | 0.019                          | 1         |
| N-CQDs                                                   | Fluorescence    | 3.32-32.26                              | 0.2367                         | 2         |
| CDs@HZIF-8                                               | Ratiometric     | 0.5-55                                  | 0.03058                        | 3         |
| MOFs (BUT-178、 BUT-179)                                  | Fluorescence    | 0.5-60                                  | 0.309 / 0.048                  | 4         |
| OSiNDs                                                   | Ratiometric     | 1-35                                    | 0.08                           | 5         |
| BNQDs                                                    | Ratiometric     | 2.5-50                                  | 0.028                          | 6         |
| Semiconductor@MOFs nanoporous                            | Fluorescence    | 0-45                                    | 0.026                          | 7         |
| AuNCs-Apt                                                | Colorimetry     | 1-16                                    | 0.0460                         | 8         |
| AuNPs-Apt                                                | Colorimetry     | 0.05-3                                  | 0.0329                         | 9         |
| PEI <sup>a</sup> /TetX2 <sup>b</sup> /NPGCE <sup>c</sup> | Electrochemical | 0.5-5                                   | 0.018                          | 10        |
| NCNSs                                                    | Fluorescence    | 0-150                                   | 0.0127                         | This work |

**Table S2.** IFE correction of NCNSs in the present of DOX with different concentrations.

| <b>DOX (<math>\mu\text{mol L}^{-1}</math>)</b> | <b><math>A_{\text{ex}}</math></b> | <b><math>A_{\text{em}}</math></b> | <b>CF</b> | <b><math>F_{\text{observed}}</math></b> | <b><math>F_{\text{corrected}}</math></b> | <b><math>E_{\text{observed}}</math></b> | <b><math>E_{\text{corrected}}</math></b> |
|------------------------------------------------|-----------------------------------|-----------------------------------|-----------|-----------------------------------------|------------------------------------------|-----------------------------------------|------------------------------------------|
| 0                                              | 0.326                             | 0.065                             | 1.517     | 45666068                                | 69297104                                 | 0                                       | 0                                        |
| 5                                              | 0.360                             | 0.067                             | 1.573     | 41668401                                | 65556126                                 | 0.088                                   | 0.054                                    |
| 10                                             | 0.395                             | 0.067                             | 1.629     | 38987864                                | 63493912                                 | 0.146                                   | 0.084                                    |
| 15                                             | 0.423                             | 0.066                             | 1.672     | 38060133                                | 63629350                                 | 0.167                                   | 0.082                                    |
| 20                                             | 0.466                             | 0.067                             | 1.744     | 36351107                                | 63394236                                 | 0.204                                   | 0.085                                    |
| 30                                             | 0.527                             | 0.067                             | 1.846     | 34074752                                | 64210780                                 | 0.254                                   | 0.092                                    |
| 40                                             | 0.585                             | 0.067                             | 1.947     | 31311184                                | 60956311                                 | 0.314                                   | 0.120                                    |
| 60                                             | 0.715                             | 0.068                             | 2.183     | 27636634                                | 60342045                                 | 0.395                                   | 0.129                                    |
| 80                                             | 0.847                             | 0.068                             | 2.434     | 24656820                                | 60018706                                 | 0.460                                   | 0.134                                    |
| 100                                            | 0.981                             | 0.068                             | 2.700     | 22331248                                | 57602544                                 | 0.533                                   | 0.169                                    |

## References

1. X. Wang, L. Li, H. Jiang, H. Zhangsun, Q. Wang, X. Sun and L. Wang, *Food Chemistry*, 2022, **374**, 131774.
2. H. Qi, M. Teng, M. Liu, S. Liu, J. Li, H. Yu, C. Teng, Z. Huang, H. Liu, Q. Shao, A. Umar, T. Ding, Q. Gao and Z. Guo, *Journal of Colloid and Interface Science*, 2019, **539**, 332-341.
3. Y. Li, Y. Wang, P. Du, L. Zhang, Y. Liu and X. Lu, *Sensors and Actuators B: Chemical*, 2022, **358**, 131526.
4. L. Liu, Q. Chen, J. Lv, Y. Li, K. Wang and J.-R. Li, *Inorganic Chemistry*, 2022, **61**, 8015-8021.
5. S. Huang, L. Yu, P. Su, T. Wen, M. Sun, D. Huang, X. Wang and S. Wang, *Analytica Chimica Acta*, 2022, **1197**, 339530.
6. K. Yang, P. Jia, J. Hou, T. Bu, X. Sun, Y. Liu and L. Wang, *ACS Sustainable Chemistry & Engineering*, 2020, **8**, 17185-17193.
7. Y. Gao, J. Wu, J. Wang, Y. Fan, S. Zhang and W. Dai, *ACS Applied Materials & Interfaces*, 2020, **12**, 11036-11044.
8. Z. Zhang, Y. Tian, P. Huang and F.-Y. Wu, *Talanta*, 2020, **208**, 120342.
9. Y.-Y. Wu, P. Huang and F.-Y. Wu, *Food Chemistry*, 2020, **304**, 125377.
10. M. Besharati, J. Hamed, S. Hosseinkhani and R. Saber, *Bioelectrochemistry*, 2019, **128**, 66-73.
